# Supplementary material for: Unravelling the origin of strong non-reciprocal chiroptical features in thin films of a chiral diketopyrrolo[3,4-c]pyrrole dye
Source: Royal Society of Chemistry journal article supplement (doi:10.1039/d4nr04956j), 2025-01-01

# Electronic Supplementary Information

## Unravelling the origin of strong non-reciprocal chiroptical features in thin films of a chiral diketo-pyrrolo[3,4-c]pyrrole dye

Gianluigi Albano,<sup>\*a</sup> Marco Bertuolo,<sup>a</sup> Francesco Zinna,<sup>a</sup> Andrea Taddeucci,<sup>a,b</sup> Tamás Jávorfí,<sup>b</sup> Rohanah Hussain,<sup>b</sup> Gianluca M. Farinola,<sup>c</sup> Gennaro Pescitelli,<sup>a</sup> Angela Punzi,<sup>c</sup> Giuliano Siligardi<sup>b</sup> and Lorenzo Di Bari <sup>\*a</sup>

<sup>a</sup> *Dipartimento di Chimica e Chimica Industriale, Università di Pisa, Via Giuseppe Moruzzi 13, 56124 Pisa (Italy)*

<sup>b</sup> *Diamond Light Source, Ltd., Chilton, Didcot OX11 0DE, United Kingdom*

<sup>c</sup> *Dipartimento di Chimica, Università degli Studi di Bari "Aldo Moro", via Edoardo Orabona 4, 70126 Bari, Italy*

\*E-mail: [gianluigi.albano@unipi.it](mailto:gianluigi.albano@unipi.it), [lorenzo.dibari@unipi.it](mailto:lorenzo.dibari@unipi.it)

### Table of contents

|                                                          |     |
|----------------------------------------------------------|-----|
| Supplementary Figures.....                               | S2  |
| <sup>1</sup> H-NMR and <sup>13</sup> C-NMR spectra ..... | S11 |

## Supplementary Figures

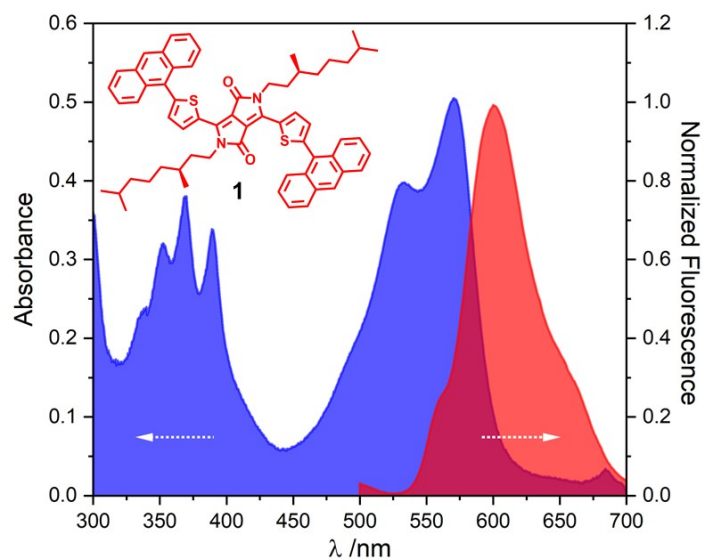

**Figure S1.**

Absorbance (blue line) and photoluminescence (red line) spectra of chiral DPP dye **1** in  $\text{CHCl}_3$  solution. For absorbance measurements: cell length 1 cm; sample concentration  $10^{-5}$  M. For photoluminescence measurements: sample concentration  $10^{-6}$  M, excitation wavelength 365 nm.

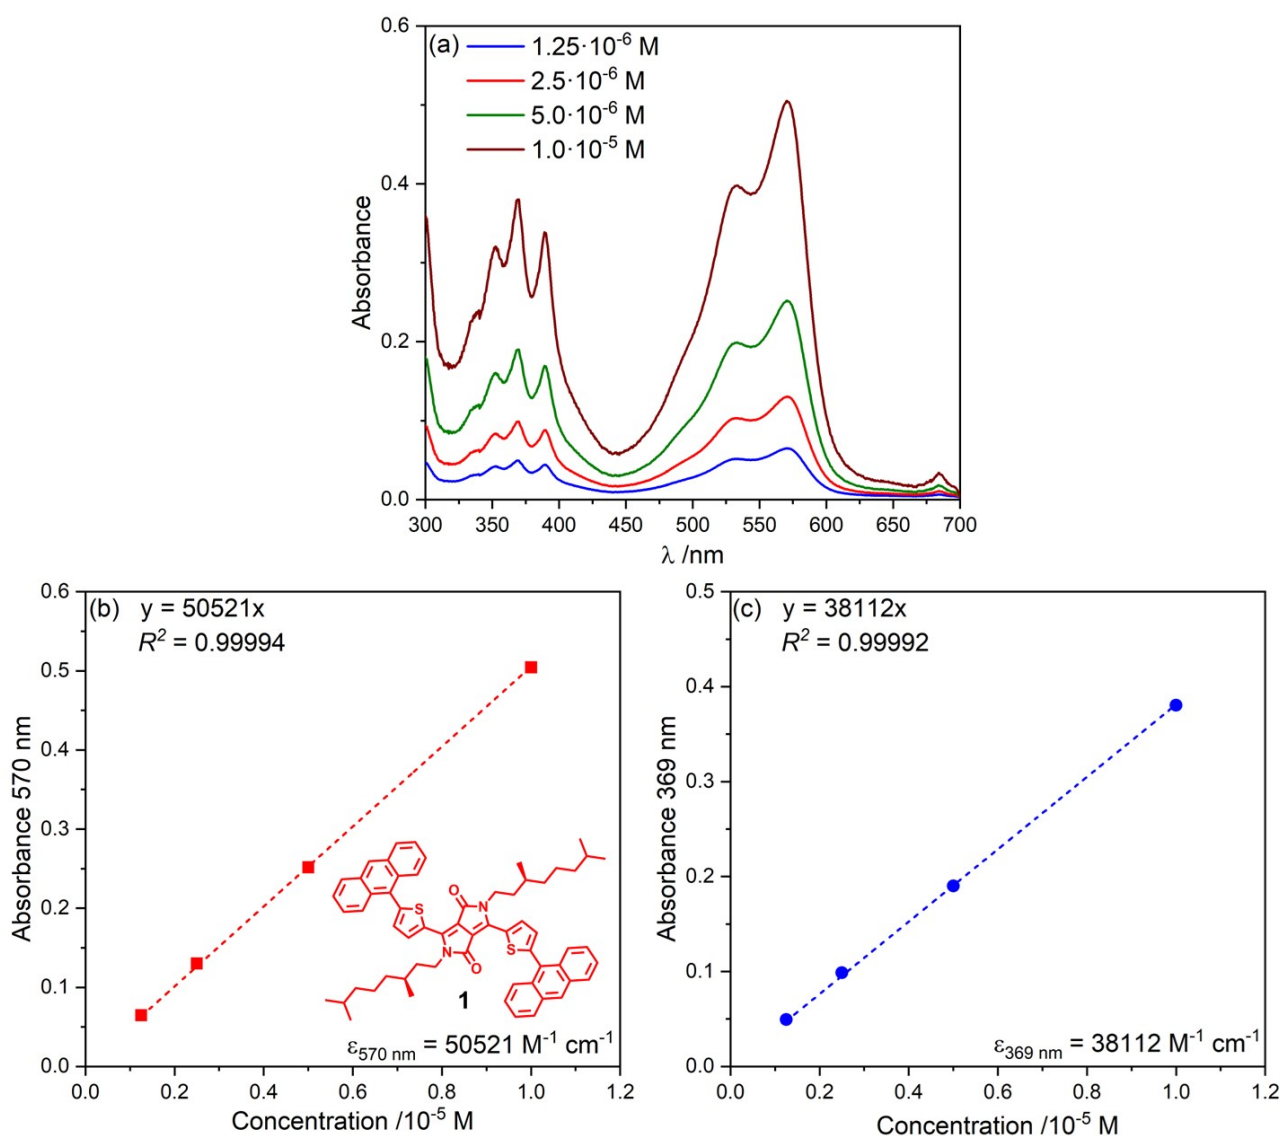

**Figure S2.**

Determination of molar extinction coefficients  $\epsilon$  of chiral DPP dye **1** in  $\text{CHCl}_3$  solution: (a) UV-Vis absorbance spectra at different concentrations (from  $1.25 \cdot 10^{-6}$  M to  $1.0 \cdot 10^{-5}$  M); (b) absorbance at 570 nm vs. concentration plot; (c) absorbance at 369 nm vs. concentration plot.

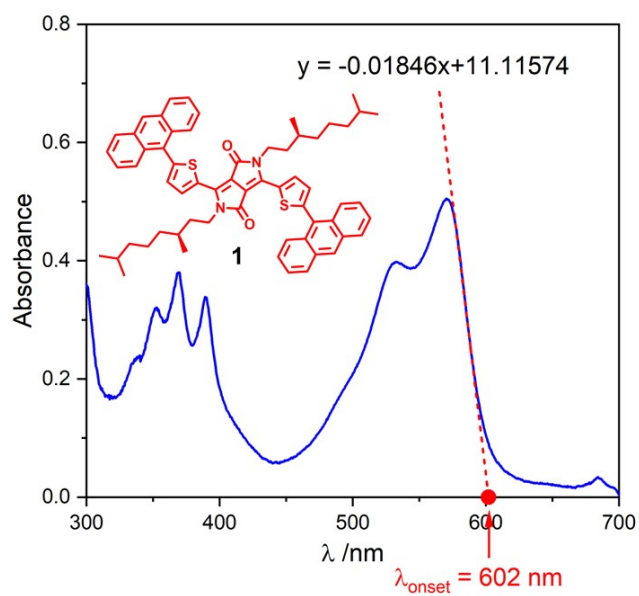

**Figure S3.**

Determination of UV-Vis absorption onset  $\lambda_{\text{onset}}$  of chiral DPP dye **1** in  $\text{CHCl}_3$  solution, from the intercept of the red-side slope of the absorbance main band with the wavelength axis.

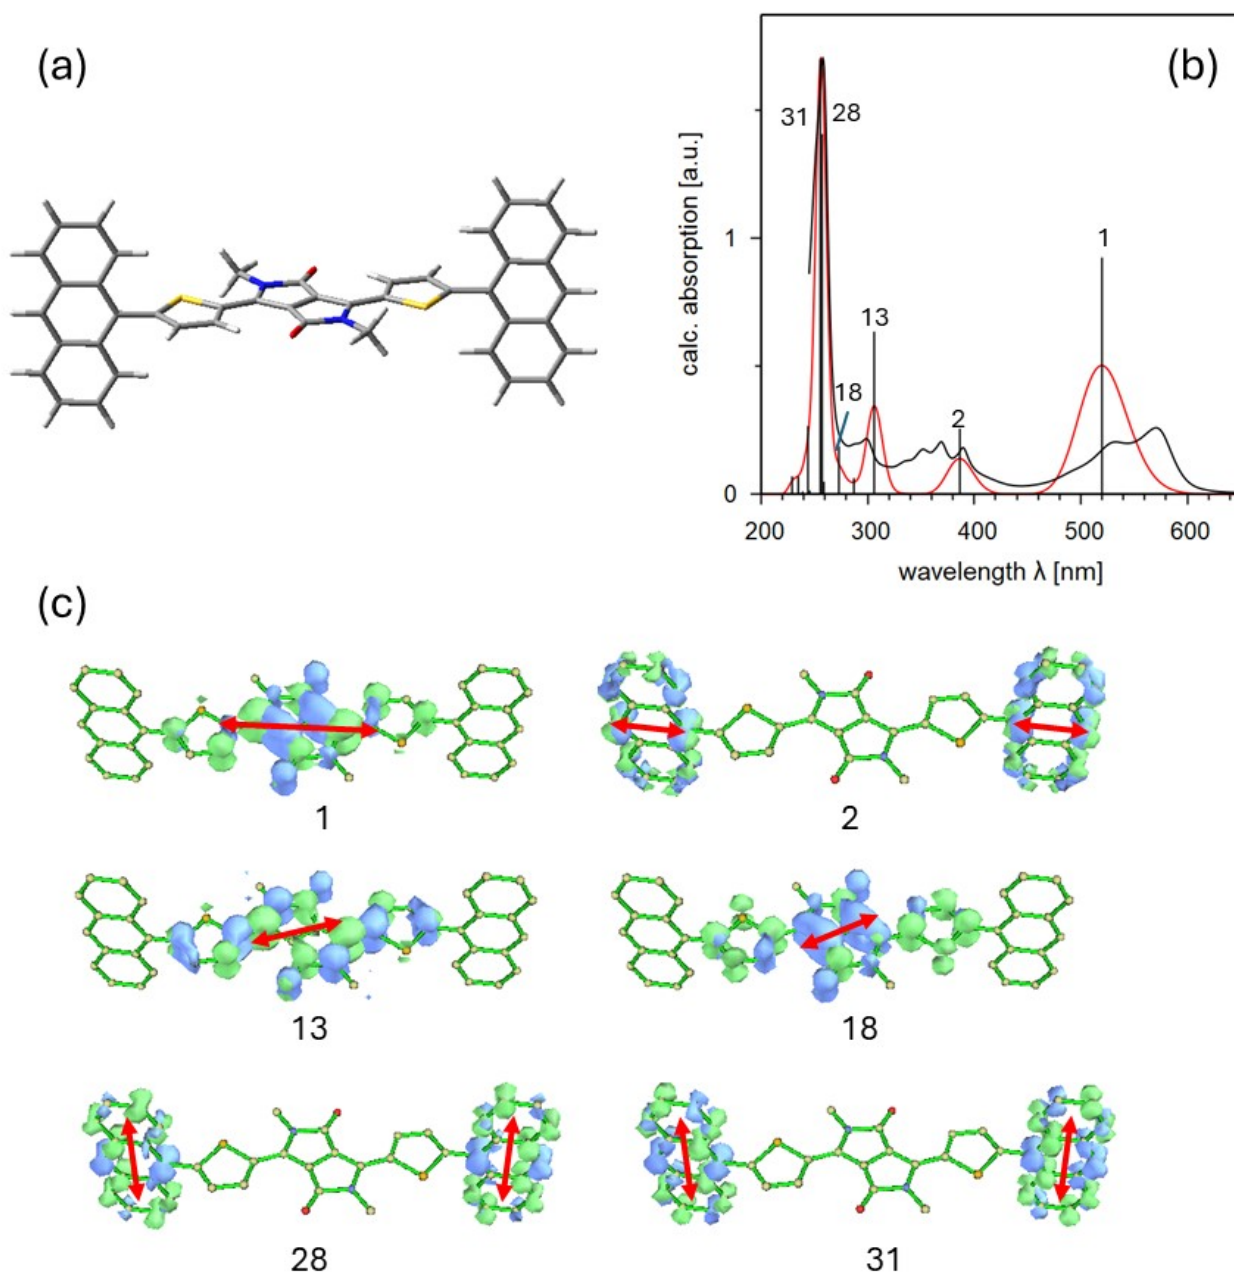

**Figure S4.**

(a) B3LYP-D3BJ/6-31+G(d,p) optimized structure of model **1'**. (b) CAM-B3LYP/def2-TZVP calculated UV-vis spectrum of **1'** (red trace) compared with the experimental solution spectrum of **1**. Vertical bars show oscillator strengths, while the numbers label the main transitions. Plotting parameters:  $\sigma=0.16$  eV, wavelength shift 20 nm. (c) Hole (blue)/electron (green) surfaces plotted for the main transitions of **1'**; isovalue 0.002. Red double arrows depict the orientation of electric transition dipole moments.

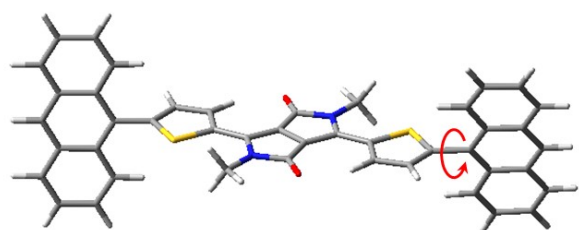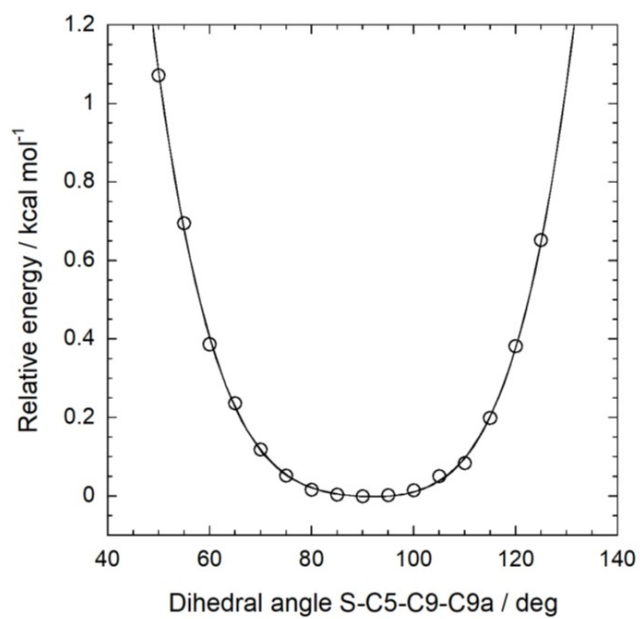

**Figure S5.**

Relaxed torsional energy scan run at B3LYP-D3BJ/6-31+G(d,p) level for the marked dihedral angle of model **1'**.

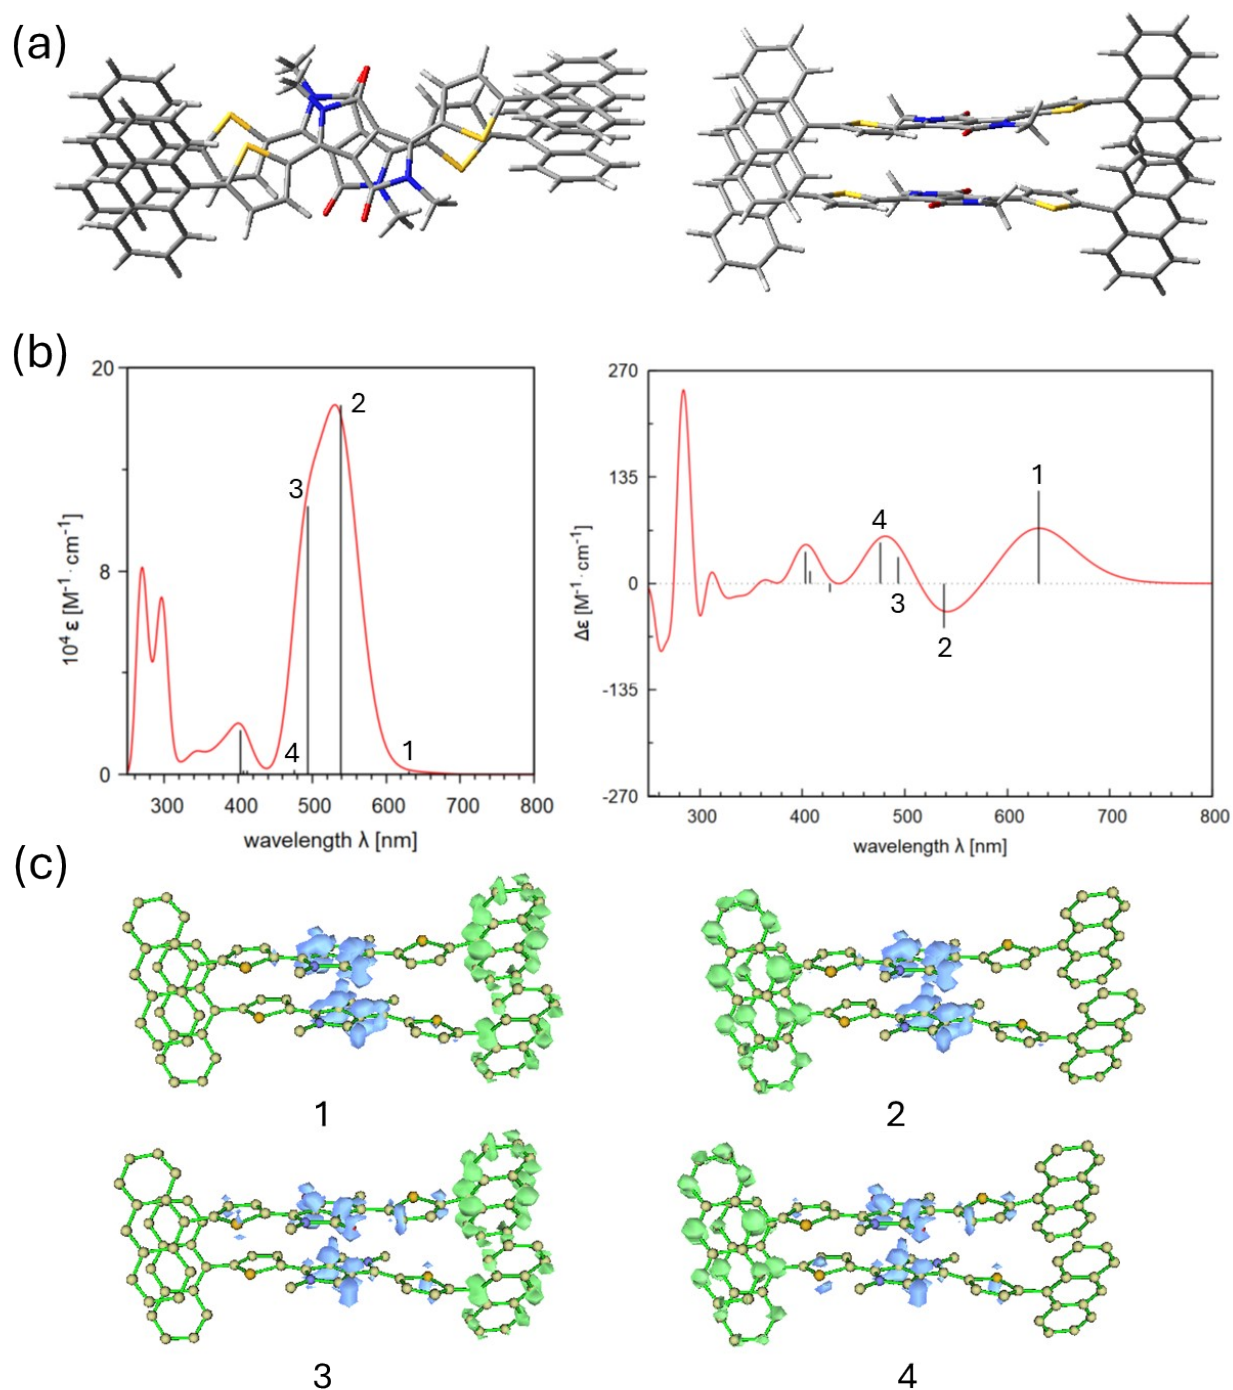

**Figure S6.**

(a) B3LYP-D3BJ/6-31G(d) optimized structure of dimer B, two views. (b) CAM-B3LYP/def2-TZVP calculated UV-vis and ECD spectra of dimer B. Vertical bars show oscillator and rotational strengths for the first 8 transitions, while the numbers label the first 4 transitions. Plotting parameters:  $\sigma = 0.16$  eV. (c) Hole (blue)/electron (green) surfaces plotted for the first 4 transitions of dimer B; isovalue 0.002.

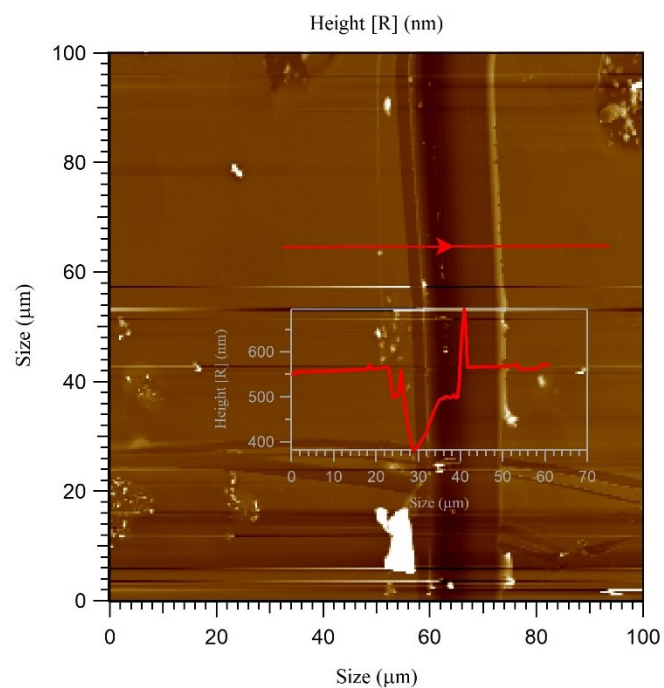

**Figure S7.**

AFM profilometry of a section perpendicular to a steel scalpel scratch for a thin film of chiral DPP dye **1** prepared by spin coating technique, used for the evaluation of thickness (about 40 nm).



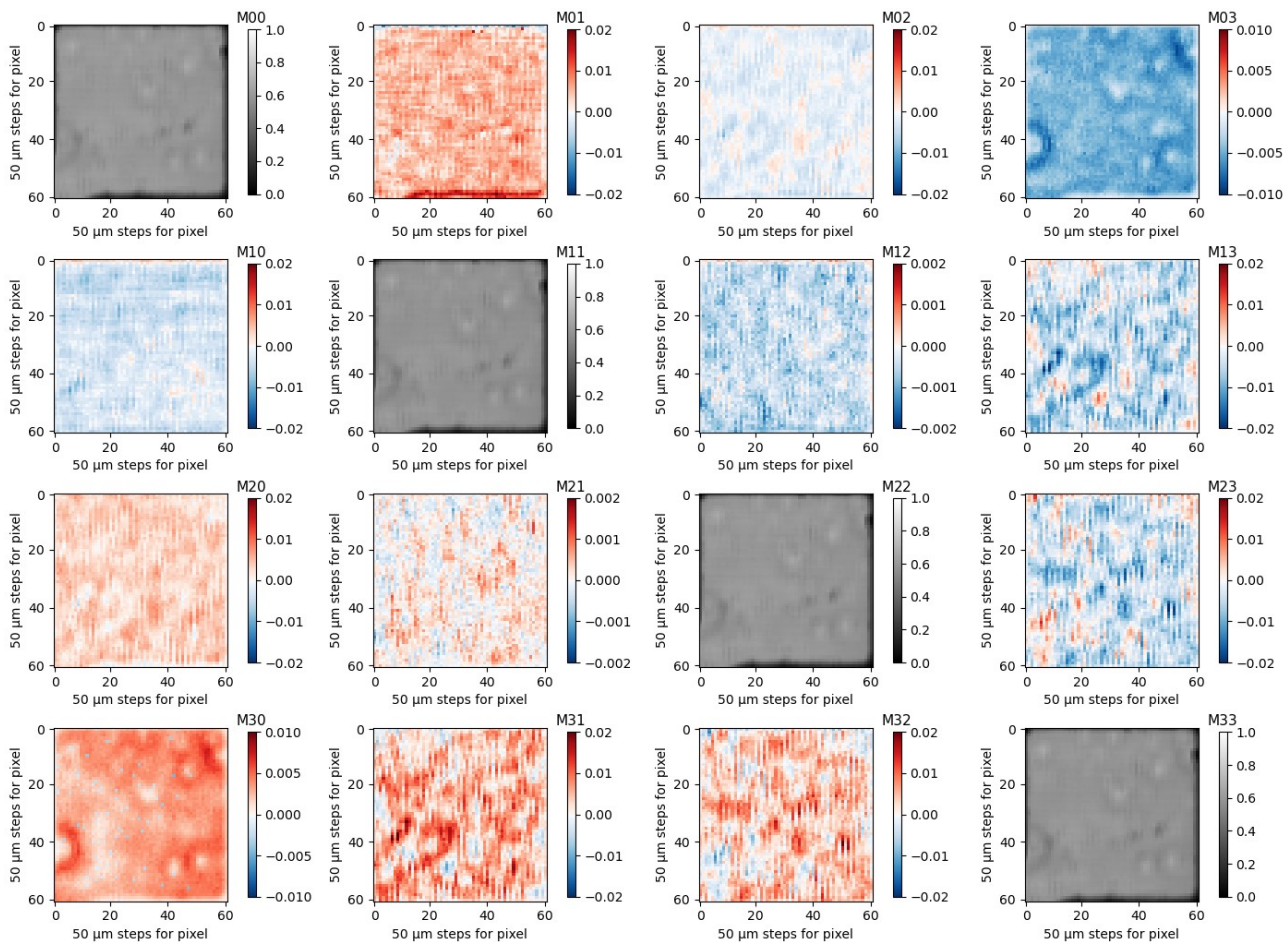

**Figure S8.**

SR-MMP<sub>i</sub> investigation for a thin film of chiral DPP dye **1** prepared by spin coating technique: 2D maps of the 16 Mueller matrix elements  $M_{ij}$  vs.  $x$ - $y$  coordinate, scanned at 291 nm for the front face of the sample on a 60×60 grid array area at 50  $\mu\text{m}$  steps with a beam-light diameter of 50  $\mu\text{m}$ .

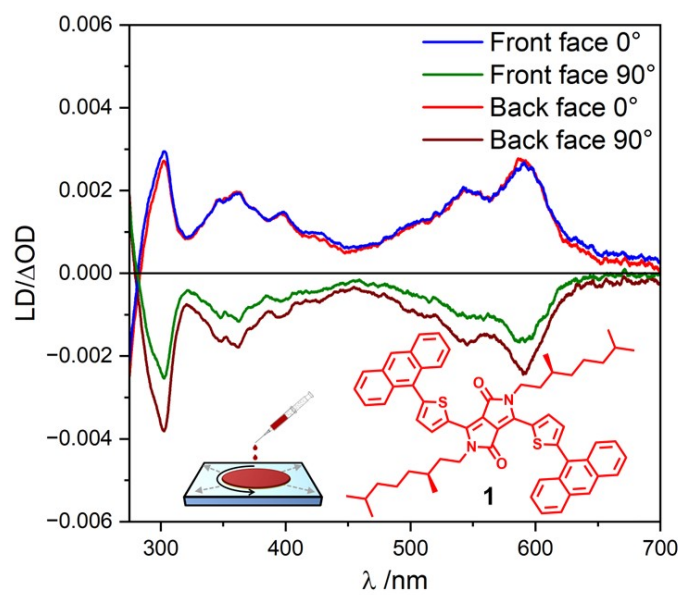

**Figure S9.**

Linear dichroism (LD) spectra for thin films of chiral DPP dye **1** prepared by spin coating technique, recorded for the front face (blue line) and the back face (red line) at two different rotation angles (0° and 90°) around the optical axis.

# $^1\text{H-NMR}$ and $^{13}\text{C-NMR}$ spectra

2,5-Bis((S)-3,7-dimethyloctyl)-3,6-di(thiophen-2-yl)pyrrolo[3,4-c]pyrrole-1,4(2H,5H)-dione (**3**):  $^1\text{H-NMR}$  (500 MHz,  $\text{CDCl}_3$ )

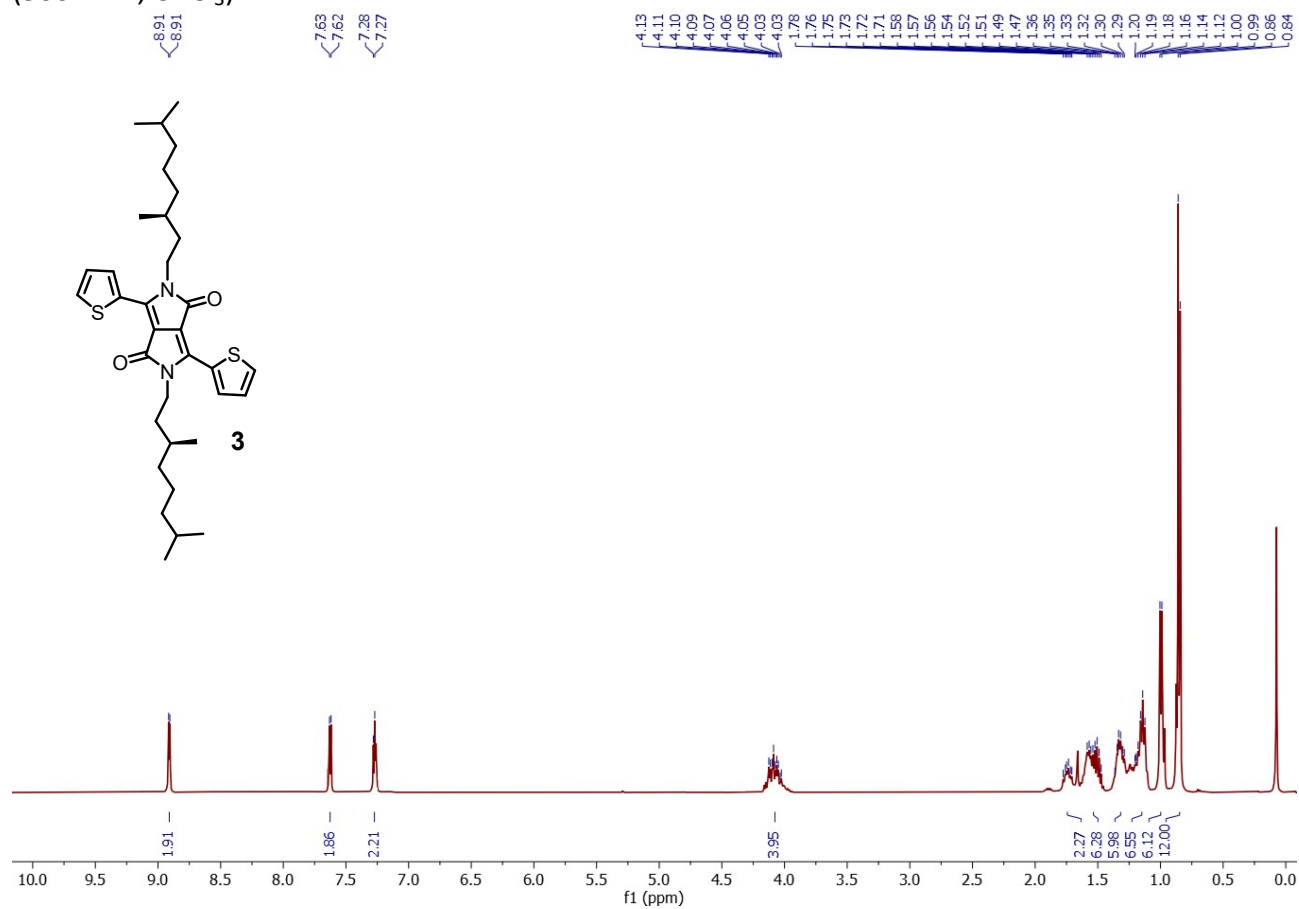

**2,5-Bis((S)-3,7-dimethyloctyl)-3,6-di(thiophen-2-yl)pyrrolo[3,4-c]pyrrole-1,4(2H,5H)-dione (3): <sup>13</sup>C-NMR**  
(125 MHz, CDCl<sub>3</sub>)

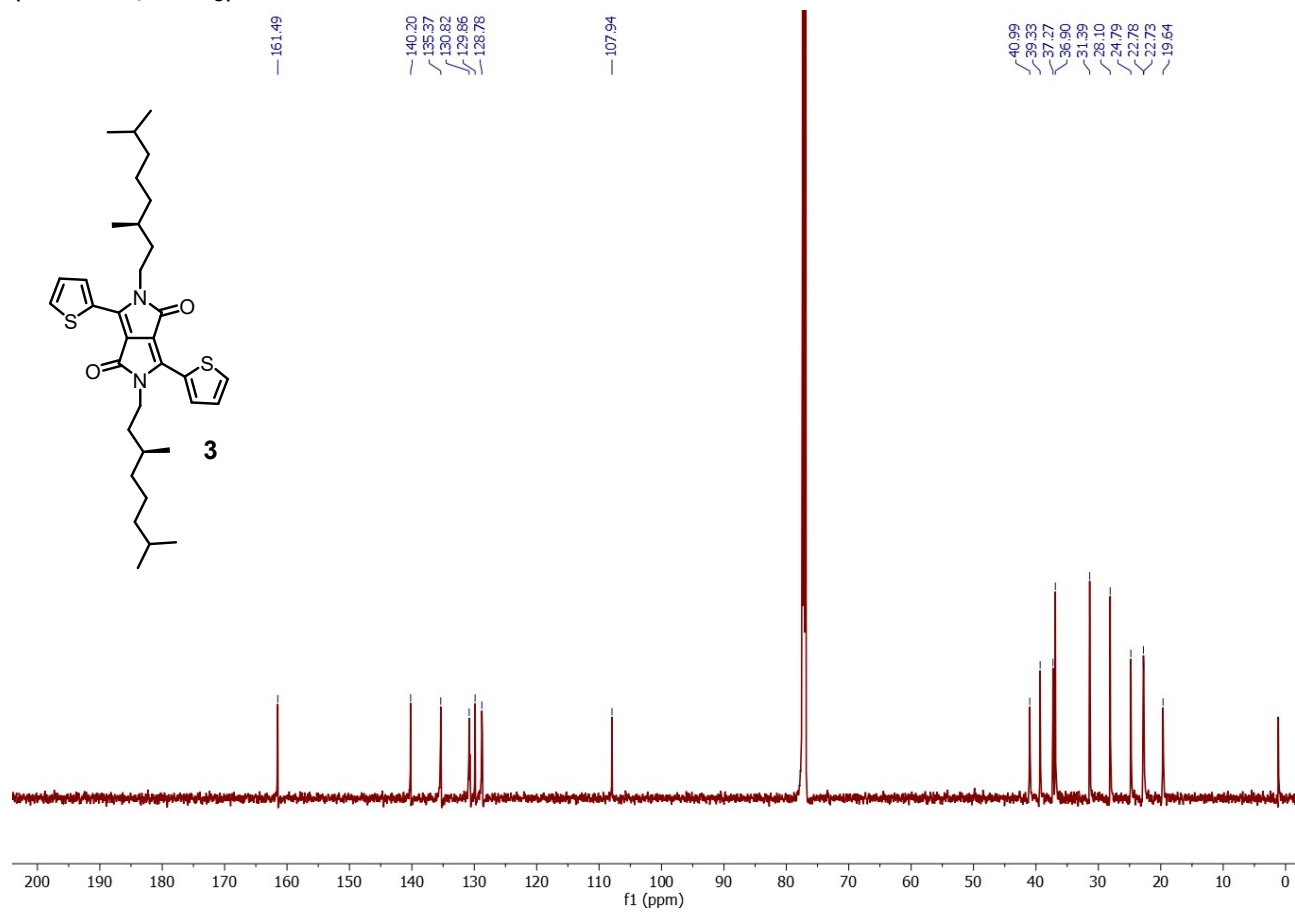

**3,6-Bis(5-(anthracen-9-yl)thiophen-2-yl)-2,5-bis((S)-3,7-dimethyloctyl)-2,5-dihydropyrrolo[3,4-c]pyrrole-1,4-dione (1): <sup>1</sup>H-NMR (500 MHz, CDCl<sub>3</sub>)**

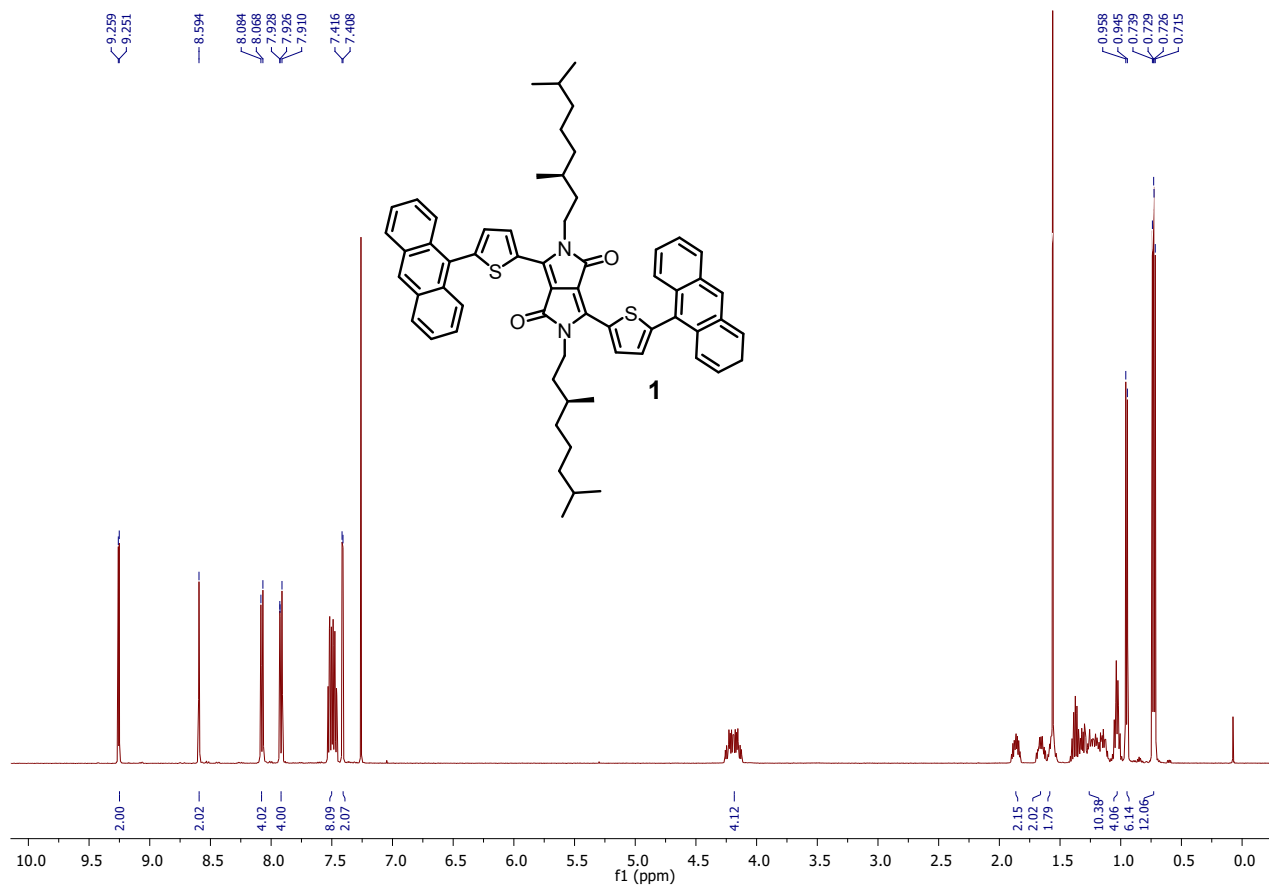

**3,6-Bis(5-(anthracen-9-yl)thiophen-2-yl)-2,5-bis((S)-3,7-dimethyloctyl)-2,5-dihydropyrrolo[3,4-c]pyrrole-1,4-dione (1):  $^{13}\text{C}$ -NMR (125 MHz,  $\text{CDCl}_3$ )**

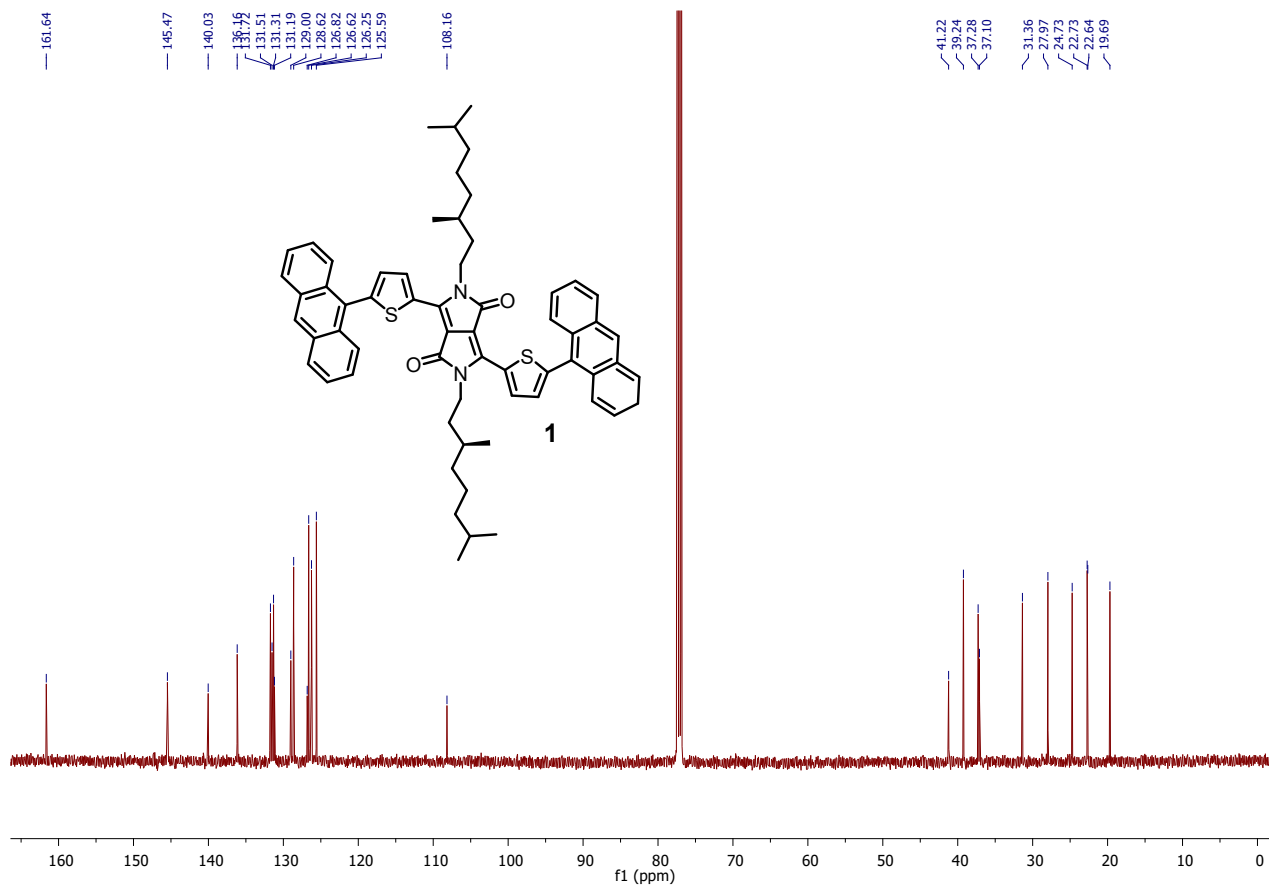

Supplement: d4nr04956j1.pdf [file d4nr04956j1.pdf]
